# Supplementary material
Source: PubMed Central journal article supplement (PMC6804627)

## SUPPLEMENTARY DATA

**Supplementary Figure S1.** NSI-189 has no effect on mitochondrial function in adult DRG sensory neurons. **(A)** Seahorse XF24 trace showing oxygen consumption rate (OCR) of control neurons treated for 24 hr with 3.0  $\mu$ M NSI-189. The following drugs were added: oligo= oligomycin, FCCP=carbonyl cyanide-4-(trifluoromethoxy)phenylhydrazone, and Rot+AA= rotenone + antimycin A. **(B)** basal, **(C)** maximal respiration and **(D)** spare respiratory capacity derived from A. N=6-7 replicate cultures. Data are mean $\pm$ SD.

SUPPLEMENTARY DATA

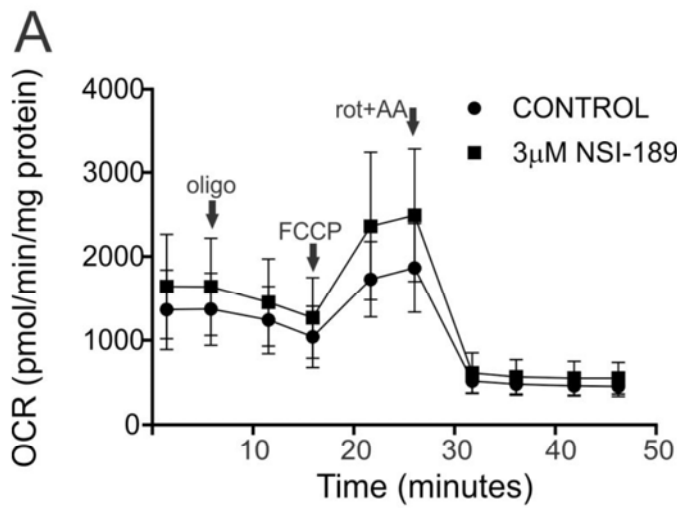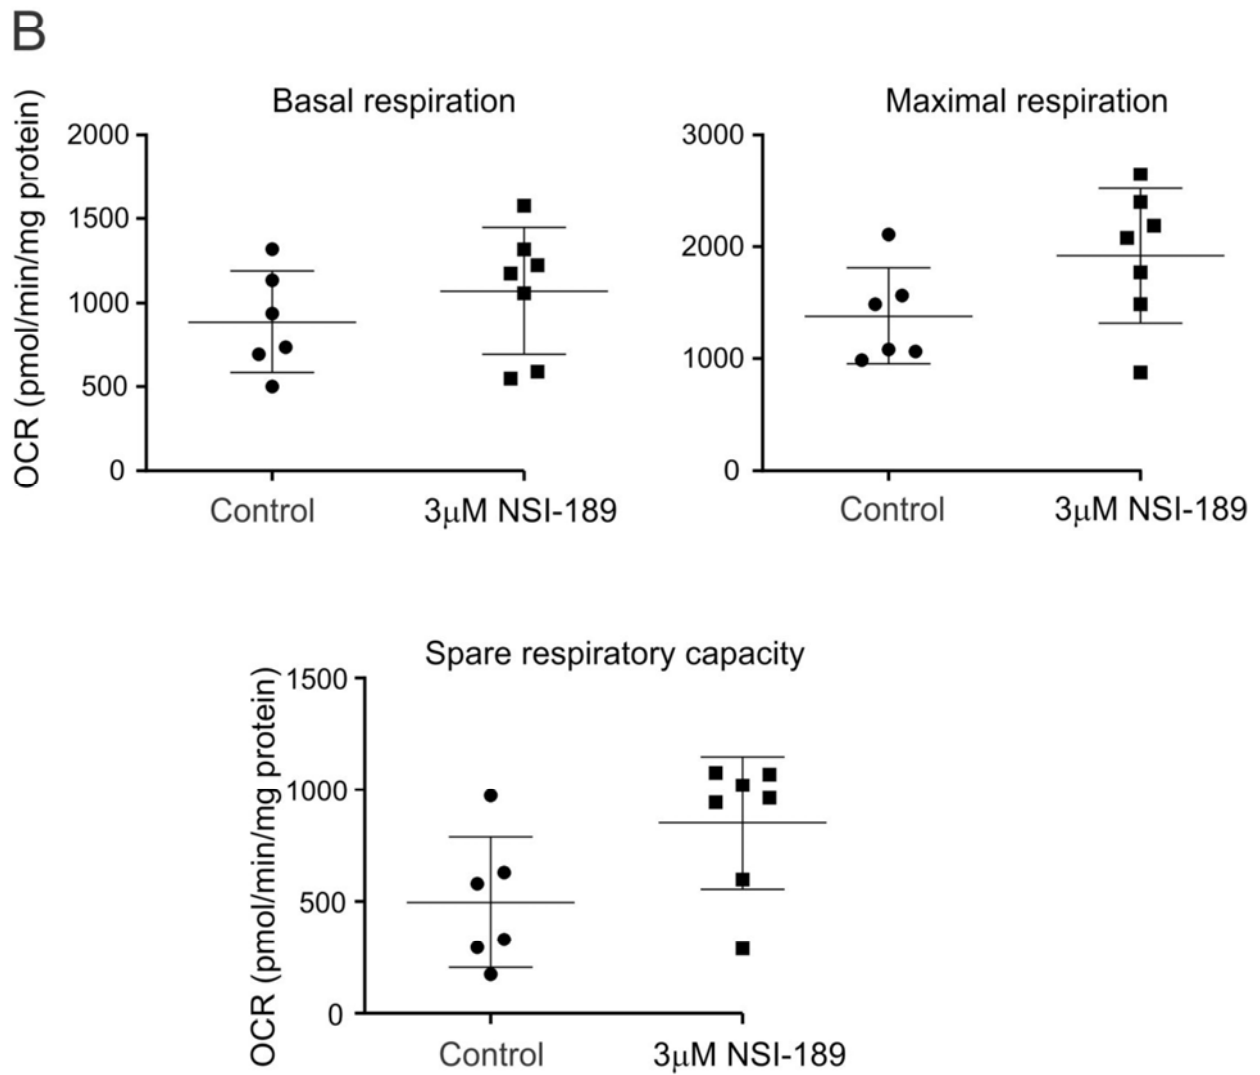

Supplement: DB190271SupplementaryData.pdf [file DB190271SupplementaryData.pdf]
